# Supplementary material
Source: Springer Nature journal article supplement (https://www.springermedizin.de/resource/supplementary/12958_2012_987_MOESM4_ESM.pdf/9566568)

**A**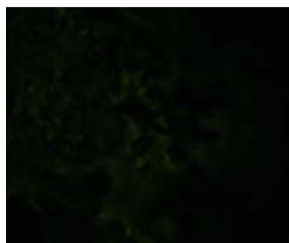

Blank control

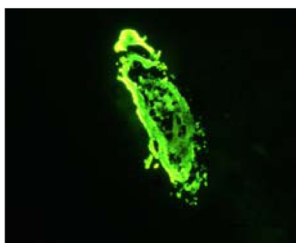

Negative control

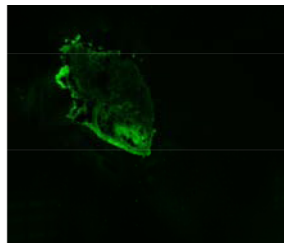

c-src siRNA

**B**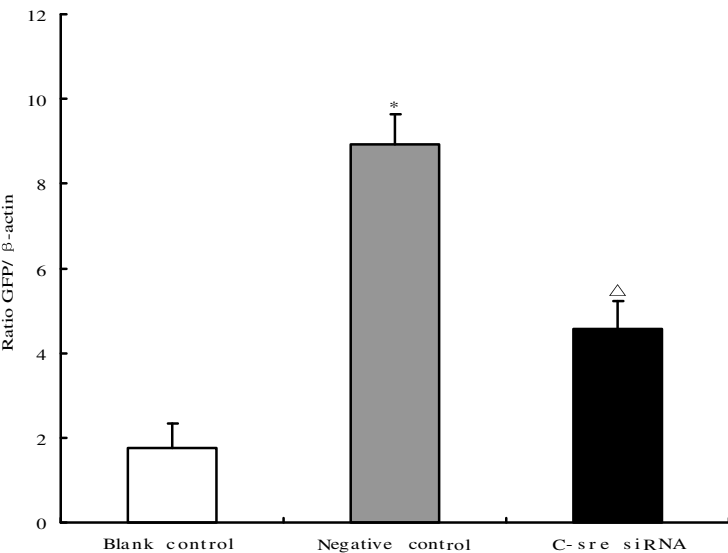

Supplement: MOESM4 [file 9566568]
